# Supplementary material
Source: Elsevier journal article supplement (https://rcastoragev2.blob.core.windows.net/31508bafe47069489f69821d46949094/mmc1.pdf)
Supplement: mmc1 [file mmc1.pdf]

# Capu and Spire Assemble a Cytoplasmic Actin Mesh that Maintains Microtubule Organization in the *Drosophila* Oocyte

Katja Dahlgaard, Alexandre A.S.F. Raposo, Teresa Niccoli, and Daniel St Johnston

Table S1. Frequency of Cytoplasmic Seething and Streaming at Stage 9

| Genotype                                                                                         | No. oocytes with cytoplasmic seething | No. oocytes with cytoplasmic streaming |
|--------------------------------------------------------------------------------------------------|---------------------------------------|----------------------------------------|
| <i>wt</i>                                                                                        | 3                                     | 0                                      |
| <i>capu</i> <sup>G7</sup> / <i>Df</i> (2l) <i>ed</i> <sup>SZ1</sup>                              | 0                                     | 15                                     |
| <i>capu</i> <sup>G7</sup> / <i>Df</i> (2l) <i>ed</i> <sup>SZ1</sup> ; <i>GFP-Capu</i>            | 13                                    | 0                                      |
| <i>capu</i> <sup>G7</sup> / <i>Df</i> (2l) <i>ed</i> <sup>SZ1</sup> ; <i>GFP-Capu</i> $\Delta$ N | 10                                    | 0                                      |
| <i>capu</i> <sup>G7</sup> / <i>Df</i> (2l) <i>ed</i> <sup>SZ1</sup> ; <i>GFP-SpireD</i>          | 0                                     | 5                                      |
| <i>spire</i> <sup>RP</sup>                                                                       | 0                                     | 10                                     |
| <i>spire</i> <sup>RP</sup> ; <i>GFP-Capu</i>                                                     | 5                                     | 0                                      |
| <i>spire</i> <sup>RP</sup> ; <i>GFP-Capu</i> $\Delta$ N                                          | 7                                     | 0                                      |
| <i>spire</i> <sup>RP</sup> / <i>spire</i> <sup>2F</sup> ; <i>GFP-Capu</i> $\Delta$ N             | 8                                     | 1                                      |
| <i>spire</i> <sup>RP</sup> / <i>Df</i> (2L) <i>Exel</i> <sup>6046</sup>                          | 0                                     | 12                                     |
| <i>spire</i> <sup>RP</sup> / <i>Df</i> (2L) <i>Exel</i> <sup>6046</sup> ; <i>GFP-SpireD</i>      | 5                                     | 0                                      |
| <i>spire</i> <sup>RP</sup> / <i>Df</i> (2L) <i>Exel</i> <sup>6046</sup> ; <i>GFP-SpireC</i>      | 0                                     | 3                                      |
| <i>chic</i> <sup>1320</sup>                                                                      | 9                                     | 16                                     |
| <i>chic</i> <sup>1320</sup> / <i>chic</i> <sup>221</sup>                                         | 0                                     | 9                                      |
| <i>chic</i> <sup>1320</sup> / <i>chic</i> <sup>221</sup> ; <i>GFP-Capu</i>                       | 0                                     | 10                                     |
| <i>chic</i> <sup>1320</sup> / <i>chic</i> <sup>221</sup> ; <i>GFP-Capu</i> $\Delta$ N            | 0                                     | 12                                     |

Table showing the number of egg chambers of various genotypes that show either the slow random movements in the oocyte cytoplasm called seething (See Figure 1I), or unidirectional fast movements of premature streaming (See Figure 1J). UASp Capu and Spire constructs were expressed under the control of noa-Gal4-VP16.

Table S2. Microtubule Appearance in Stage 9 and 10A Oocytes

| Genotype                                                                                                | Stage9          |     | Stage 10A       |    |
|---------------------------------------------------------------------------------------------------------|-----------------|-----|-----------------|----|
|                                                                                                         | Cortical arrays | N   | Cortical arrays | N  |
| <i>w</i>                                                                                                | 0%              | 60  | 0%              | 17 |
| <i>capu</i> <sup>G7</sup> / <i>Df(2l)ed</i> <sup>SZ1</sup>                                              | 100%            | 76  | 100%            | 40 |
| <i>capu</i> <sup>G7</sup> / <i>Df(2l)ed</i> <sup>SZ1</sup> ; <i>GFP-Capu</i>                            | 0%              | 58  | 0%              | 13 |
| <i>capu</i> <sup>G7</sup> / <i>Df(2l)ed</i> <sup>SZ1</sup> ; <i>GFP-CapuΔN</i>                          | 0%              | 65  | 0%              | 24 |
| <i>capu</i> <sup>G7</sup> / <i>Df(2l)ed</i> <sup>SZ1</sup> ; <i>GFP-Spir-D</i>                          | 100%            | 27  | 100%            | 12 |
| <i>spire</i> <sup>RP</sup>                                                                              | 99%             | 95  | 100%            | 15 |
| <i>spire</i> <sup>RP</sup> ; <i>Capu</i>                                                                | 48%             | 83  | 100%            | 17 |
| <i>spire</i> <sup>RP</sup> ; <i>GFP-Capu</i>                                                            | 12%             | 200 | 56%             | 32 |
| <i>spire</i> <sup>RP</sup> ; <i>GFP-CapuΔN</i>                                                          | 1%              | 69  | 40%             | 15 |
| <i>spire</i> <sup>RP</sup> / <i>spire</i> <sup>2F</sup> ; <i>GFP-Spir-D</i>                             | 0%              | 32  | 0%              | 10 |
| <i>capu</i> <sup>RK</sup> <i>FRT nlsGFP/capu</i> <sup>G7</sup>                                          | 95%             | 72  | 100%            | 8  |
| <i>capu</i> <sup>RK</sup> <i>khc</i> <sup>17</sup> / <i>capu</i> <sup>G7</sup> <i>khc</i> <sup>17</sup> | 0%              | 8   | 0%              | 2  |

Table showing the percentage of egg chambers with dense arrays of microtubules along the oocyte cortex (See Figure 1O) instead of the normal anterior to posterior gradient of microtubules (See Figure 1M). N indicates the number of egg chambers analysed for each genotype. UASp Capu and Spire constructs were expressed under the control of *noa*-Gal4-VP16.

Table S3. *oskar* mRNA Localisation in Stage 9-10B Egg Chambers

| Genotype                                                                       | Posterior | Posterior & Diffuse | Diffuse | N   |
|--------------------------------------------------------------------------------|-----------|---------------------|---------|-----|
| <i>W</i>                                                                       | 100%      | 0%                  | 0%      | 71  |
| <i>capu</i> <sup>G7</sup> / <i>Df(2l)ed</i> <sup>SZ1</sup>                     | 0%        | 0%                  | 100%    | 56  |
| <i>capu</i> <sup>G7</sup> / <i>Df(2l)ed</i> <sup>SZ1</sup> ; <i>GFP-CapuΔN</i> | 100%      | 0%                  | 0%      | 106 |
| <i>spire</i> <sup>RP</sup>                                                     | 0%        | 2%                  | 98%     | 101 |
| <i>spire</i> <sup>RP</sup> ; <i>GFP-Capu</i>                                   | 21%       | 70%                 | 9%      | 133 |
| <i>spire</i> <sup>RP</sup> ; <i>GFP-CapuΔN</i>                                 | 53%       | 21%                 | 25%     | 255 |
| <i>spire</i> <sup>2F</sup> / <i>spire</i> <sup>RP</sup> ; <i>GFP-Spir-D</i>    | 100%      | 0%                  | 0%      | 26  |

Table showing the distribution of *oskar* mRNA localisation phenotypes, as visualised by *oskar in situ* hybridisation, in stage 9-10B egg chambers of various genotypes. The localisation patterns were classified as: Diffuse localisation (See Figure 1N); Posterior and diffuse (See Figure S2B) and Posterior localisation (See Figure 1P). N indicates the number of egg chambers analysed for each genotype. UASp Capu and Spire constructs were expressed under the control of *noa*-Gal4-VP16.

Table S4. The Effect of Latrunculin A on Ooplasmic Movement at Stage 9

| Genotype                                                   | Without Latrunculin A |          | With Latrunculin A |          |
|------------------------------------------------------------|-----------------------|----------|--------------------|----------|
|                                                            | Streaming             | Seething | Streaming          | Seething |
| <i>w</i>                                                   | 0                     | 3        | 12                 | 0        |
| <i>capu<sup>G7</sup>/Df(2l)ed<sup>SZ1</sup>;GFP-Capu</i>   | 0                     | 13       | 14                 | 1        |
| <i>capu<sup>G7</sup>/Df(2l)ed<sup>SZ1</sup>;GFP-CapuΔN</i> | 0                     | 10       | 0                  | 6        |
| <i>spire<sup>RP</sup>/spire<sup>2F</sup>;GFP-Spir-D</i>    |                       |          | 7                  | 0        |
| <i>spire<sup>RP</sup>/spire<sup>2F</sup>;GFP-CapuΔN</i>    | 1                     | 8        | 7                  | 0        |

Table showing the number of control egg chambers or egg chambers treated with Latrunculin A of various genotypes that show either slow random movements of the oocyte cytoplasm (seething (see Figure 1I)), or the fast unidirectional movements of premature streaming (See Figure 1J). UASp Capu and Spire constructs were expressed under the control of noa-Gal4-VP16.

Table S5. The Effect of Latrunculin A on Microtubule Appearance at Stage 9

| Genotype                                                   | Without Latrunculin A |    | With Latrunculin A |    |
|------------------------------------------------------------|-----------------------|----|--------------------|----|
|                                                            | Cortical arrays       | N  | Cortical arrays    | N  |
| <i>w</i>                                                   | 0%                    | 13 | 100%               | 55 |
| <i>capu<sup>G7</sup>/Df(2l)ed<sup>SZ1</sup>;GFP-Capu</i>   | 0%                    | 54 | 97%                | 65 |
| <i>capu<sup>G7</sup>/Df(2l)ed<sup>SZ1</sup>;GFP-CapuΔN</i> | 0%                    | 53 | 0%                 | 54 |
| <i>spire<sup>RP</sup>/spire<sup>2F</sup>;GFP-Spir-D</i>    | 0%                    | 33 | 100%               | 63 |
| <i>spire<sup>RP</sup>/spire<sup>2F</sup>;GFP-CapuΔN</i>    | 52%                   | 67 | 96%                | 56 |

Table giving the percentage of control stage 9 egg chambers or stage 9 egg chambers treated with Latrunculin A that contain dense arrays of microtubules along the oocyte cortex (See Figure 1O) instead of the normal anterior to posterior gradient of microtubules (See Figure 1M). N indicates the number of egg chambers analysed for each genotype. UASp Capu and Spire constructs were expressed under the control of noa-Gal4-VP16.

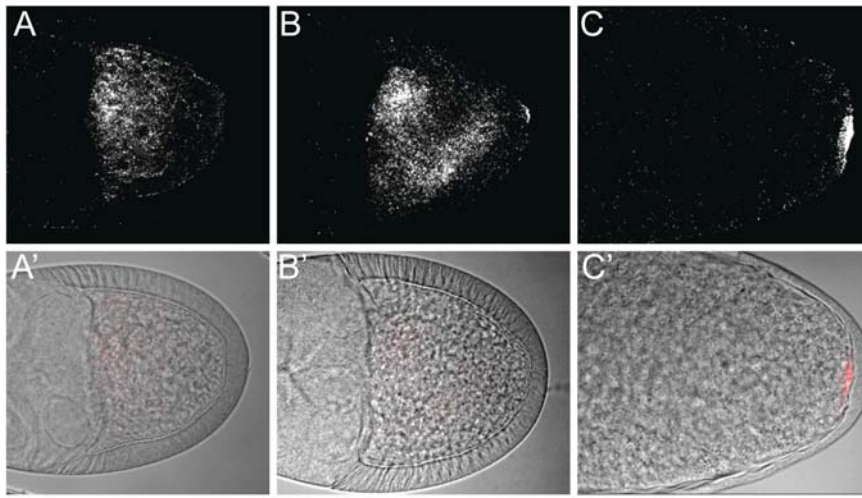

S1 D. *oskar* mRNA localisation in *spire*<sup>RP</sup>/*Df*(2L)*Exel*<sup>6046</sup> egg chambers

| Stage | Diffuse | Posterior<br>& Diffuse | Posterior | N   |
|-------|---------|------------------------|-----------|-----|
| 9     | 97%     | 3%                     | 0%        | 117 |
| 10A   | 86%     | 14%                    | 0%        | 71  |
| 10B   | 68%     | 32%                    | 0%        | 66  |
| 11-13 | 46%     | 50%                    | 4%        | 54  |

**Figure S1. *oskar* mRNA Localises to the Posterior of Late Stage *spire* Mutant Oocytes**

(A-C') Fluorescent in situ hybridisations to *oskar* mRNA in *spire*<sup>RP</sup>/*Df*(2L)*Exel*<sup>6046</sup> egg chambers. (A-C) Shows the fluorescent signal from an in situ hybridization to *oskar* mRNA, while (A'-C') show DIC images of the oocytes. (A and A') Stage 9; (B and B') Stage 10A; (C and C') Stage 13. As oogenesis progresses, more *oskar* mRNA accumulates at the posterior of the oocyte.

(D) Table showing the distribution of *oskar* mRNA at different stages of oogenesis in *spire*<sup>RP</sup>/*Df*(2L)*Exel*<sup>6046</sup> oocytes. The localisation patterns are classified as diffuse localisation as seen in (A); posterior and diffuse as in (B) and posterior as in (C). N indicates the number of egg chambers analysed at each stage.

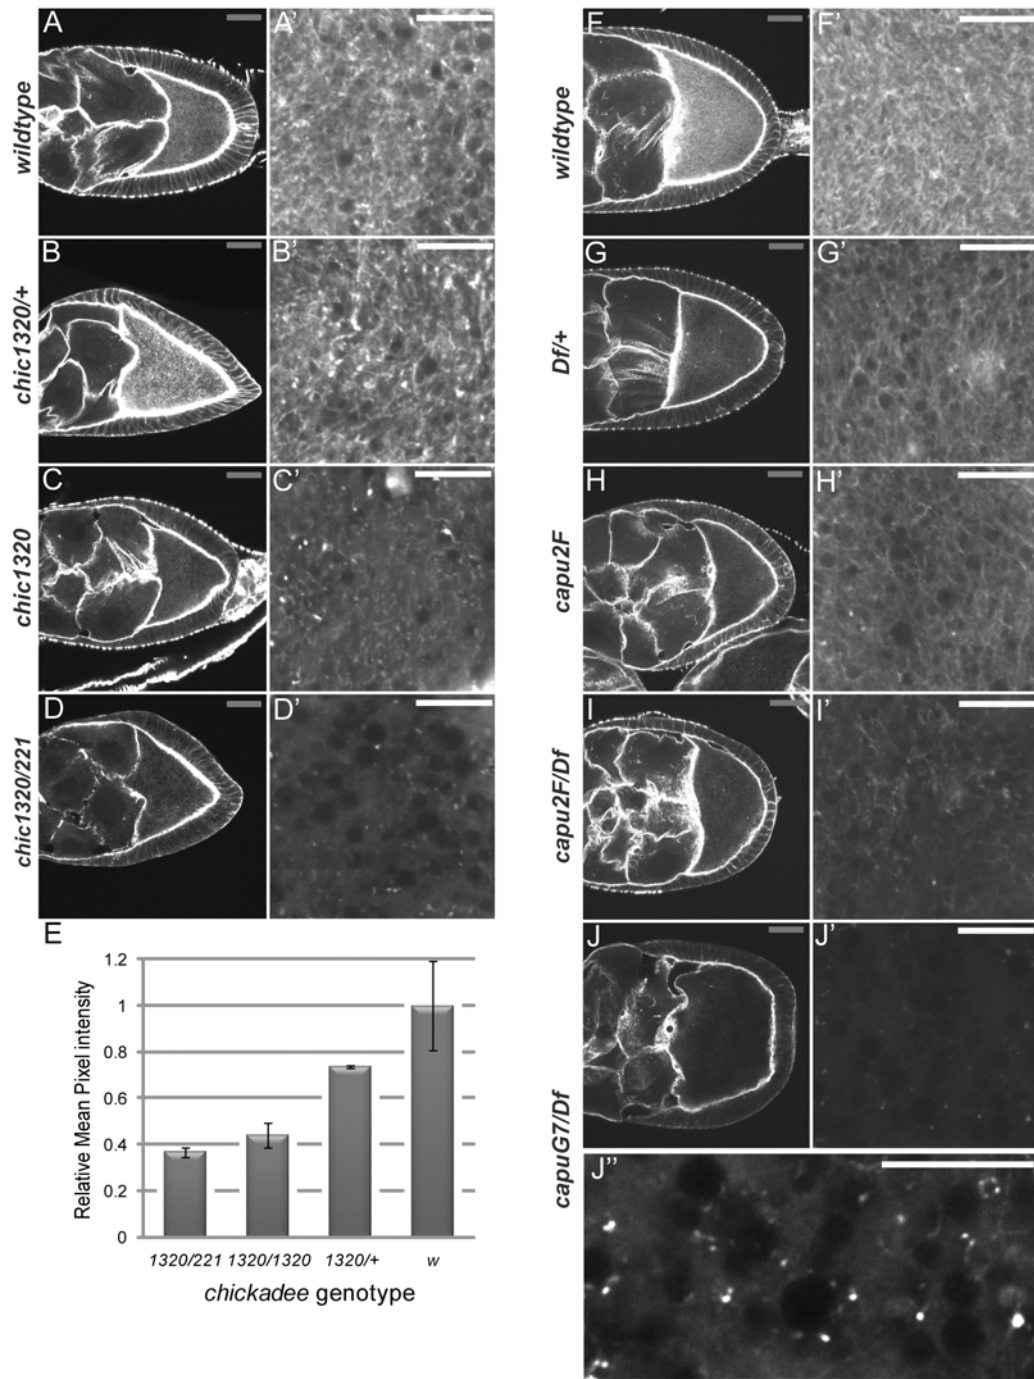

(E) Bar diagram showing the relative average of mean pixel intensity of the F-actin staining in 30  $\mu$ m by 30  $\mu$ m regions of 3-5 stage 9 egg chambers of different *chic* genotypes.

(F-J'') A similar graded effect on the actin mesh is observed in *capu* mutant combinations of increasing strength. (F) Wildtype; (G) *Df(2L)ed<sup>SZ1</sup>/+* ; (H) *capu<sup>2F</sup>*; (I) *capu<sup>2F</sup>/Df(2L)ed<sup>SZ1</sup>*; (J) *capu<sup>G7</sup>/Df(2L)ed<sup>SZ1</sup>* . (J'') shows the bright dots of residual F-actin staining in the oocyte cytoplasm in the absence of Capu.

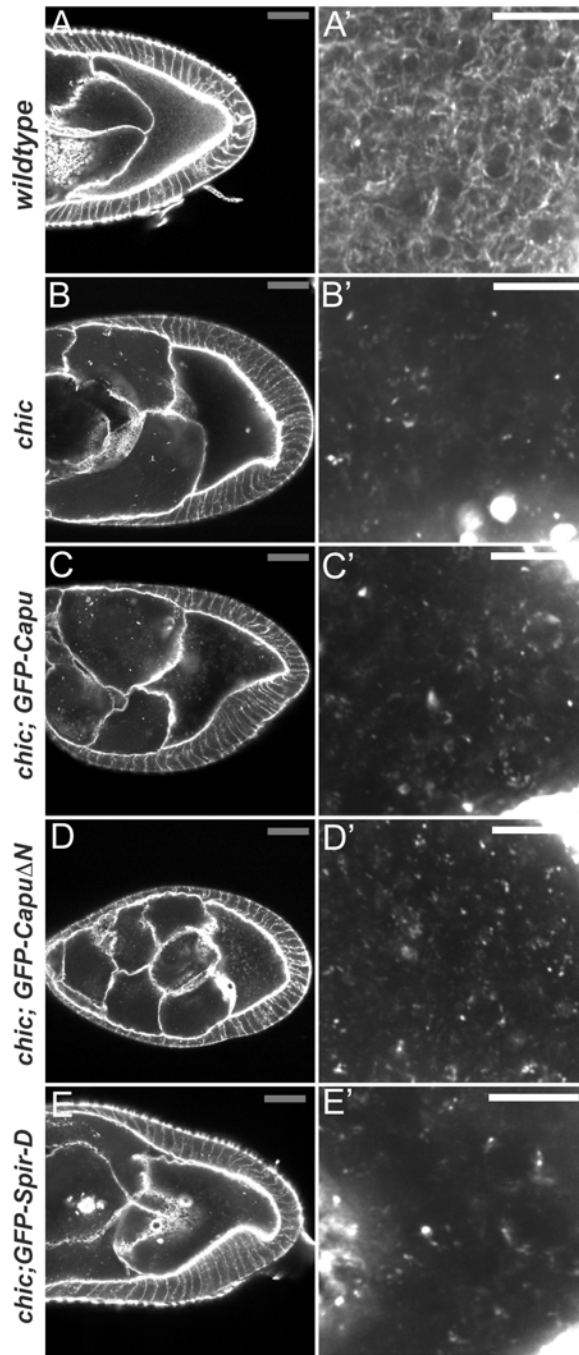

**Figure S3. The *chic* Mutant Phenotype Is Not Rescued by GFP-Capu, GFP-CapuΔN, or GFP-SpireD**

(A-E) Confocal images of s7age 8-9 egg chambers stained with TRITC-Phalloidin to label F-actin. (A' - E') show a magnification of the oocyte cytoplasm imaged 10  $\mu$ m from the cortex.

(A) wildtype egg chamber, (B) *chic*<sup>1320</sup>/*chic*<sup>221</sup>, (C) *chic*<sup>1320</sup>/*chic*<sup>221</sup>; *GFP-Capu*, (D) *chic*<sup>1320</sup>/*chic*<sup>221</sup>; *GFP-Capu*ΔN, (E) *chic*<sup>1320</sup>/*chic*<sup>221</sup>; *GFP-Spir-D*.

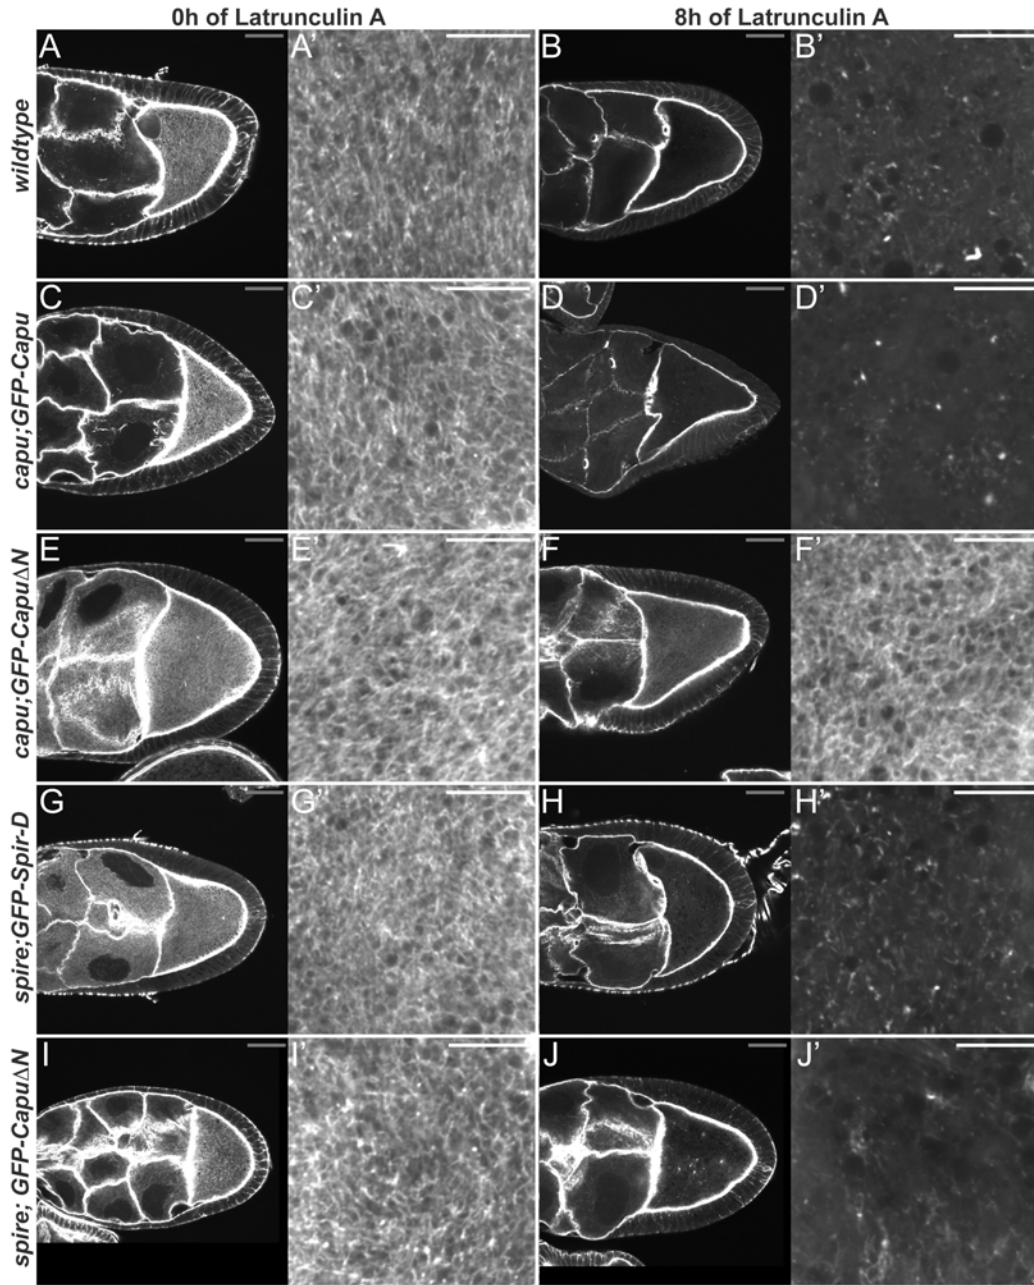

**Figure S4. The Actin Mesh in Untreated and Latrunculin A Treated Egg Chambers**

(A-J) Confocal images of stage 9 egg chambers stained with TRITC-Phalloidin to label F-actin, (Grey scale bar, 30  $\mu$ m). (A'-J') show a magnification of the F-actin stained oocyte cytoplasm imaged 10  $\mu$ m from the cortex (White scale bar, 10 $\mu$ m). (A,C,E,G, I) are images of untreated egg chambers, while (B,D,F,H) are images of egg chambers after 8 hours of treatment. (A-D) were processed in parallel as were (E) and (F), (G) and (H), and (I) and (J).

(A-B') wildtype; (C-D') *capu*<sup>G7/Df(2L)ed<sup>SZ1</sup>; *GFP-Capu*; (E-F') *capu*<sup>G7/Df(2L)ed<sup>SZ1</sup>; *GFP-CapuΔN*; (G-H') *spire*<sup>2F/spire<sup>RP</sup>; *GFP-Spir-D*; (I-J') *spire*<sup>2F/spire<sup>RP</sup>; *GFP-CapuΔN*.</sup></sup></sup></sup>
